# Supplementary material for: “Wash-free” synthesis of cyclodextrin metal–organic frameworks
Source: Royal Society of Chemistry journal article supplement (doi:10.1039/d3mr00006k), 2024-01-01
Supplement: d3mr00006k1.pdf [file d3mr00006k1.pdf]

## Electronic Supplementary Information

### “Wash-free” synthesis of cyclodextrin metal-organic frameworks

Shuhei Fujita,<sup>a</sup> Kazunori Kadota,<sup>b</sup> Atsushi Koike,<sup>c</sup> Hiromasa Uchiyama,<sup>b</sup>  
Yuichi Tozuka<sup>b</sup> and Shunsuke Tanaka<sup>\*ad</sup>

<sup>a</sup> Department of Chemical, Energy and Environmental Engineering, Faculty of Environmental and Urban Engineering, Kansai University, 3-3-35 Yamate-cho, Suita-shi, Osaka 564-8680 JAPAN

<sup>b</sup> Department of Formulation Design and Pharmaceutical Technology, Faculty of Pharmacy, Osaka Medical and Pharmaceutical University, Takatsuki, Osaka 569-1094, Japan.

<sup>c</sup> Department of Pathobiochemistry, Faculty of Pharmacy, Osaka Medical and Pharmaceutical University, Takatsuki, Osaka 569-1094, Japan.

<sup>d</sup> Collaborate Research Center of Engineering, Medicine and Pharmacology (CEMP), Organization for Research and Development of Innovative Science and Technology (ORDIST), Kansai University, 3-3-35 Yamate-cho, Suita-shi, Osaka 564-8680 JAPAN

\*E-mail: shun\_tnk@kansai-u.ac.jp

#### Table of Contents

|                                                                                                            | Pages |
|------------------------------------------------------------------------------------------------------------|-------|
| <b>Experimental</b> Materials, Synthesis and Characterization.                                             | S2–S3 |
| <b>Figure S1</b> PXRD patterns of products prepared without mechanochemical treatment.                     | S4    |
| <b>Figure S2</b> PXRD patterns of CD-MOFs prepared with different potassium sources.                       | S5    |
| <b>Figure S3</b> Thermogravimetric curves of CD-MOFs prepared using different potassium sources.           | S6    |
| <b>Figure S4</b> N <sub>2</sub> adsorption isotherms of CD-MOFs prepared with different potassium sources. | S7    |
| <b>Figure S5</b> N <sub>2</sub> adsorption isotherm of product washed after mechanochemical treatment.     | S8    |
| <b>Figure S6</b> FESEM images of CD-MOFs.                                                                  | S9    |
| <b>Figure S7</b> PXRD patterns of CD-MOFs dried at 60 °C and 80 °C after mechanochemical step.             | S10   |
| <b>Figure S8</b> PXRD patterns of CD-MOFs prepared with different ethanol/CD ratios.                       | S11   |
| <b>Figure S9</b> PXRD patterns of CD-MOFs prepared at different mechanochemical treatment times.           | S12   |
| <b>Figure S10</b> PXRD patterns of drug-encapsulated CD-MOF.                                               | S13   |

## Experimental

### Materials

Potassium hydrogen carbonate ( $\text{KHCO}_3$ , >99.5 %), potassium acetate ( $\text{CH}_3\text{COOK}$ , >97.0 %), potassium hydroxide ( $\text{KOH}$ , >85.0 %), potassium chloride ( $\text{KCl}$ , >99.5 %), potassium carbonate ( $\text{K}_2\text{CO}_3$ , >99.5 %), gamma-cyclodextrin (CD, >97.0 %), levofloxacin (>98.0 %), methanol (>99.5 %) and ethanol (>99.5 %) were purchased from Fujifilm Wako Pure Chemical Corporation. All chemicals were used without further purification.

### Synthesis

Wash-free mechanochemical synthesis: CD and potassium source ( $\text{KHCO}_3$ ,  $\text{CH}_3\text{COOK}$ ,  $\text{KOH}$ ,  $\text{KCl}$  or  $\text{K}_2\text{CO}_3$ ) together with a small amount of ethanol were placed in a 250 ml zirconia milling jar containing 30 YTZ® balls. Typically, the molar ratio of mixture is  $\text{CD} : \text{K}^+ : \text{ethanol} = 1 : 2 : 0.04$ ; the  $\text{K}^+/\text{CD}$  ratio can be varied from 0.67 to 8 and the ethanol/CD ratio can be reduced to 0.0085. These were then milling at a rotation rate of 150 rpm for 5 min by using planetary mill Pulverisette 6 (Fritsch Japan). The products were only dried under atmospheric pressure at 60 °C or 80 °C for 1 h.

Vapor diffusion method: CD-MOF was prepared as described by Smaldone et al.<sup>1</sup> with some minor modifications. 1 mmol of CD and 8 mmol of  $\text{KOH}$  were dissolved in 20 mL of deionized water. The aqueous solution was filtered with a 0.20- $\mu\text{m}$  nylon membrane. The container containing the aqueous solution was placed in a container containing 50 mL of methanol and exposed to vapor diffusion at 30 °C. After 7 days, the aqueous solution containing the diffused methanol vapor was centrifuged and separated into liquid and solid phases. The product was thrice-washed with methanol. Next, the product was dried overnight and then vacuum dried at 50 °C for 6 h.

### Characterization

Powder X-ray diffraction (PXRD) was performed at room temperature under atmospheric pressure using a RIGAKU MiniFlex600.  $\text{CuK}\alpha$  (wavelength 0.15418 nm) was used as an X-ray tube at 30 kV and 15 mA. The BET area and pore volume were obtained by performing nitrogen adsorption/desorption measurements at the temperature of liquid nitrogen (77 K) using a MicrotracBEL BELSORP-max. Before measurements, pretreatment was performed by heating at 50 °C for 6 h in a vacuum using a MicrotracBEL BELPREP-vac. Thermogravimetric analysis was conducted using a Shimadzu Corporation DTG-60H. Approximately 5 mg of sample was placed in an alumina cell and heated from room temperature to 600 °C at a rate of 5 °C/min. Field emission scanning electron microscope (FESEM) images were recorded on a Hitachi High-Tech S-4800. The measurement was performed at an acceleration voltage of 2.0–3.0 kV. To estimate the drug content in CD-MOF, the chemical compositions of the final product were measured by using an energy-dispersive X-ray spectrometry Emax EVOLution (Horiba) and drug concentrations of the elute were measured using a UV-visible spectrophotometer UV-1900i (Shimadzu).

The cytotoxicity of the CD-MOF carriers was evaluated by the cell viability assay using MRC-5 lung fibroblast cells ( $4 \times 10^5$  cells/mL), A549 alveolar epithelial cells ( $4 \times 10^5$  cells/mL) and Caco-2 small intestine epithelial cells (confluent).<sup>2,3</sup> MRC-5 and Caco-2 cells were cultured in Minimum Essential Medium (MEM; Sigma-Aldrich; St. Louis, MO, USA) and A549 cells were cultivated in Dulbecco's Modified Eagle's Medium (DMEM; Sigma-Aldrich) under 5% CO<sub>2</sub> at 37 °C for 24 h. Each medium was supplemented with 10% (v/v) fetal calf serum, 50 U/mL penicillin, and 50 µg/mL streptomycin. The cells were treated with a dispersion of CD-MOFs at a final concentration of 0.1–10 g/L. After 24 h of treatment, cell viability was assessed using a Cell Counting Kit-8 (Dojindo Molecular Technologies, Kumamoto, Japan) according to the manufactures' protocols. The absorbance at 450 nm was measured using a Multiskan FC microplate photometer (Thermo Fisher Scientific, Waltham, MA, USA). The cell viability (%) was calculated using the following equation:

$$\text{cell viability(\%)} = \frac{\text{abs}_{\text{sample}}}{\text{abs}_{\text{control}}} \times 100$$

where  $\text{abs}_{\text{sample}}$  and  $\text{abs}_{\text{control}}$  represent the absorbance with and without the addition of samples, respectively.

## References

- 1 R. A. Smaldone, R. S. Forgan, H. Furukawa, J. J. Gassensmith, A. M. Z. Slawin, O. M. Yaghi and J. F. Stoddart, *Angew. Chem., Int. Ed.*, 2010, **49**, 8630–8634.
- 2 J. Y. Tse, K. Kadota, Y. Hirata, M. Taniguchi, H. Uchiyama and Y. Tozuka, *J. Drug Deliv. Sci. Technol.*, 2018, **48**, 137–144.
- 3 J. Y. Tse, A. Koike, K. Kadota, H. Uchiyama, K. Fujimori and Y. Tozuka, *Eur. J. Pharm. Biopharm.*, 2021, **167**, 116–126.

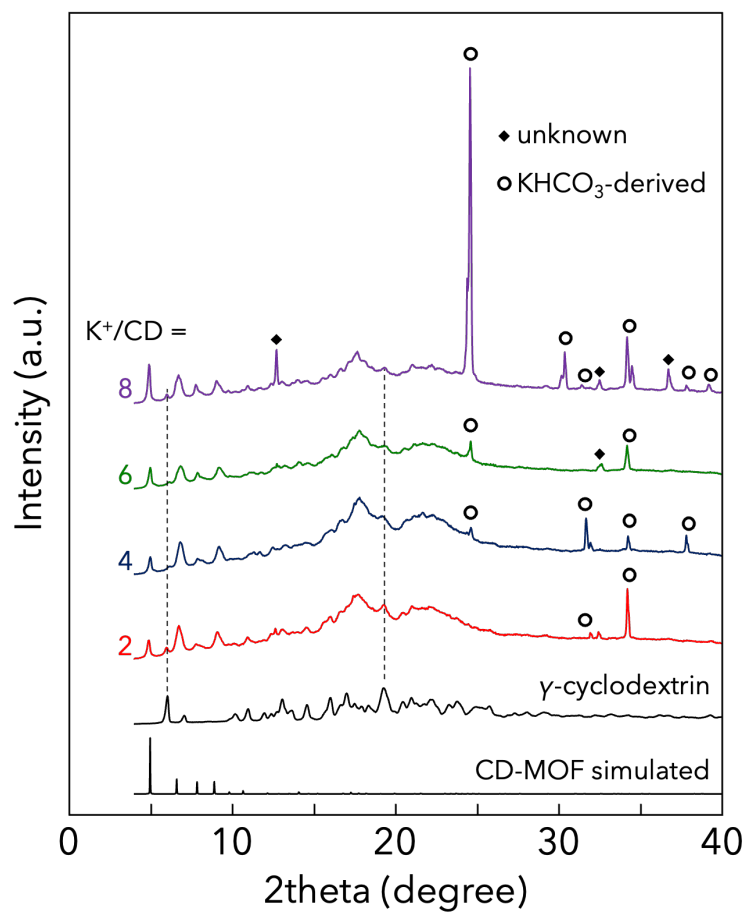

Figure S1 PXRD patterns of the products prepared without mechanochemical treatment.

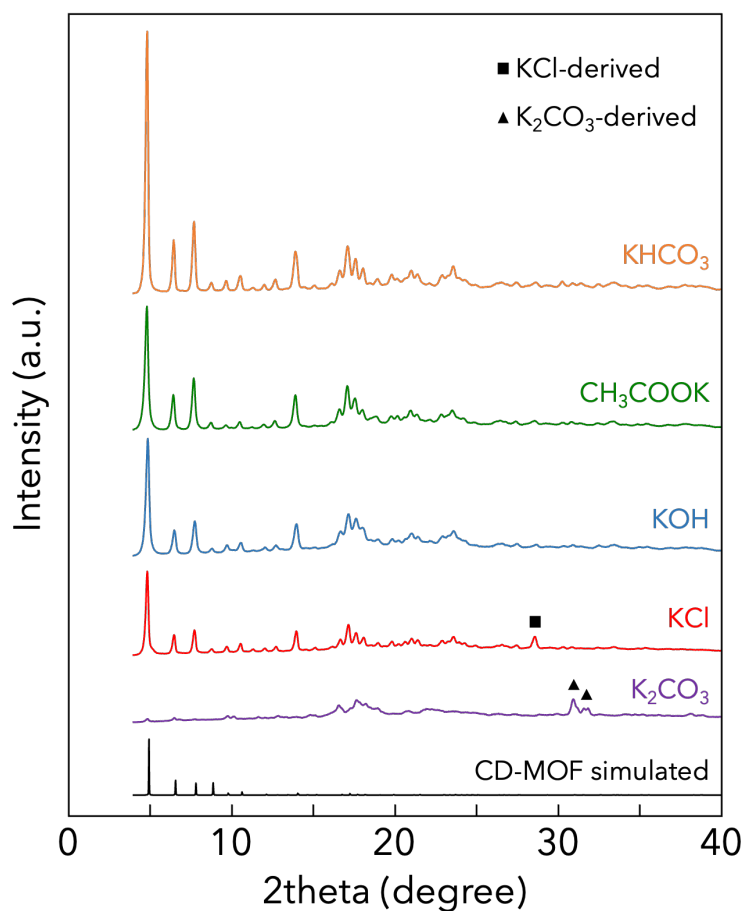

**Figure S2** PXR D patterns of CD-MOFs prepared with different potassium sources (KHCO<sub>3</sub>, CH<sub>3</sub>COOK, KOH, KCl and K<sub>2</sub>CO<sub>3</sub>). CD-MOFs were prepared at K<sup>+</sup>/CD = 2 by wash-free mechanochemical synthesis.

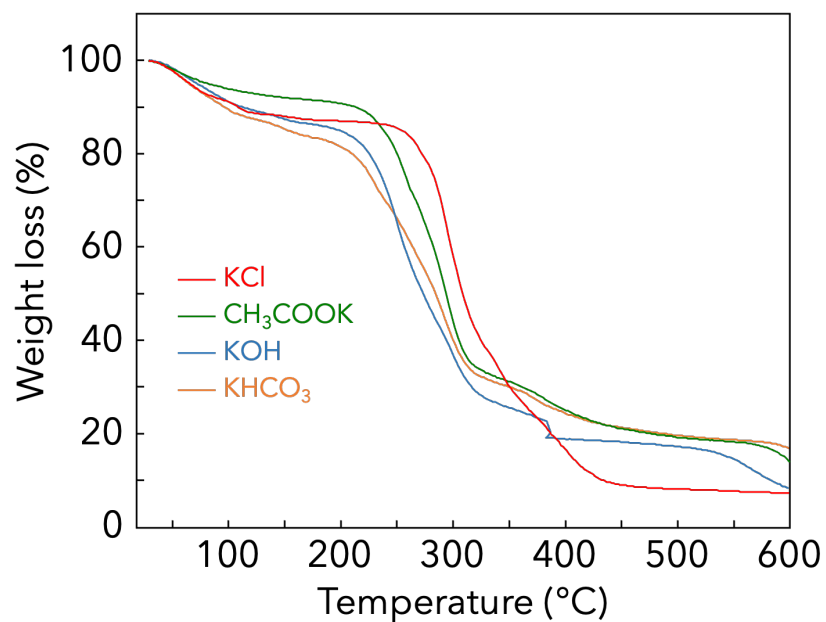

**Figure S3** Thermogravimetric curves of CD-MOFs prepared using different potassium sources (KHCO<sub>3</sub>, CH<sub>3</sub>COOK, KOH and KCl). CD-MOFs were prepared at K<sup>+</sup>/CD = 2 by wash-free mechanochemical synthesis.

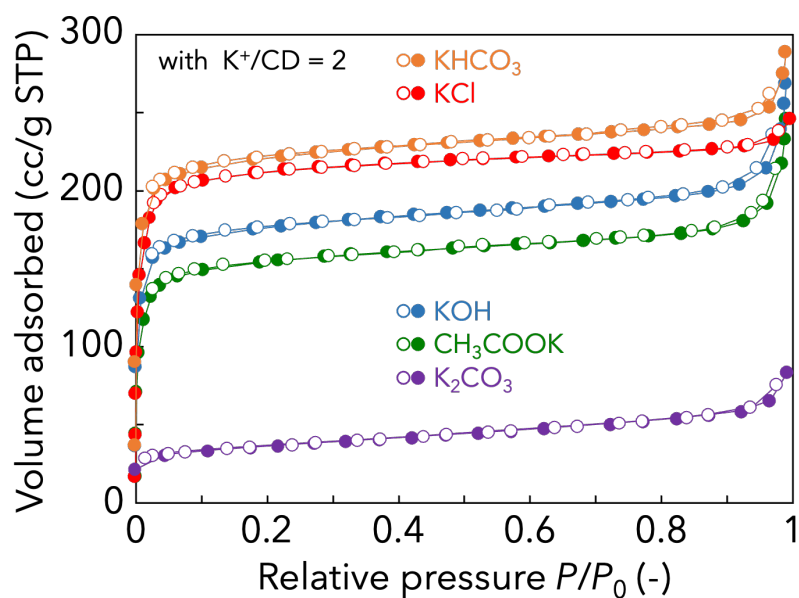

**Figure S4**  $\text{N}_2$  adsorption/desorption isotherms of CD-MOFs prepared with different potassium sources ( $\text{KHCO}_3$ ,  $\text{CH}_3\text{COOK}$ ,  $\text{KOH}$ ,  $\text{KCl}$  and  $\text{K}_2\text{CO}_3$ ). Before the measurements, the samples were degassed at  $50^\circ\text{C}$  under vacuum for 6 h.

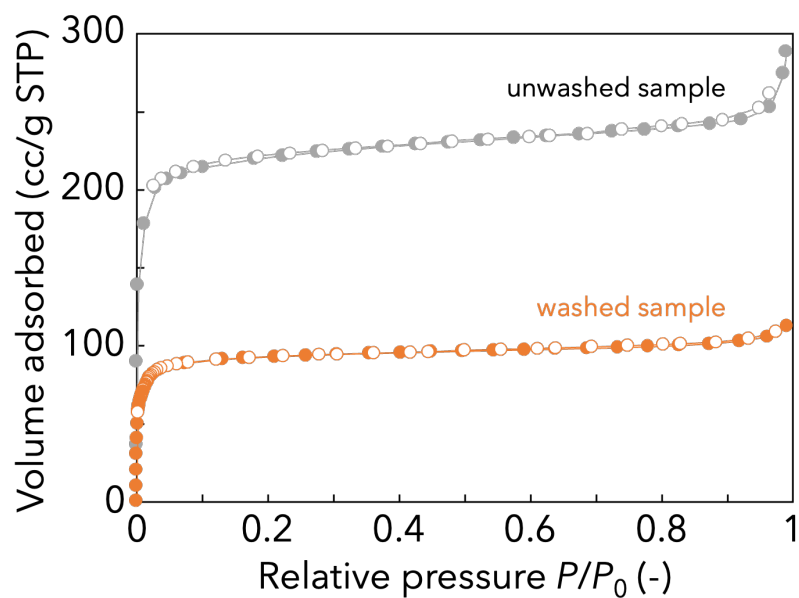

**Figure S5**  $N_2$  adsorption/desorption isotherm of the product washed after mechanochemical treatment. The product was prepared using  $KHCO_3$  at  $K^+/CD = 2$ . Before the measurements, the samples were degassed at  $50\text{ }^\circ\text{C}$  under vacuum for 6 h.



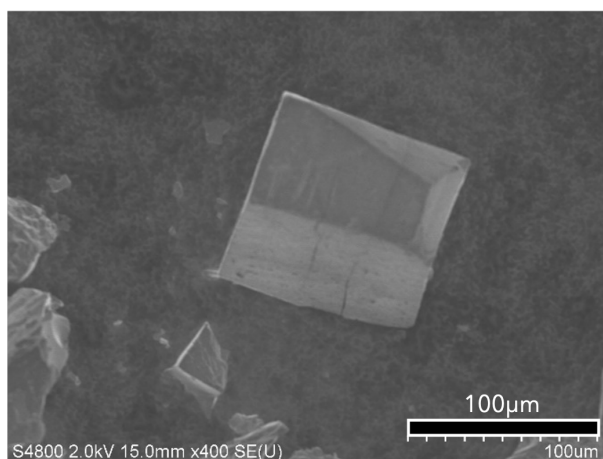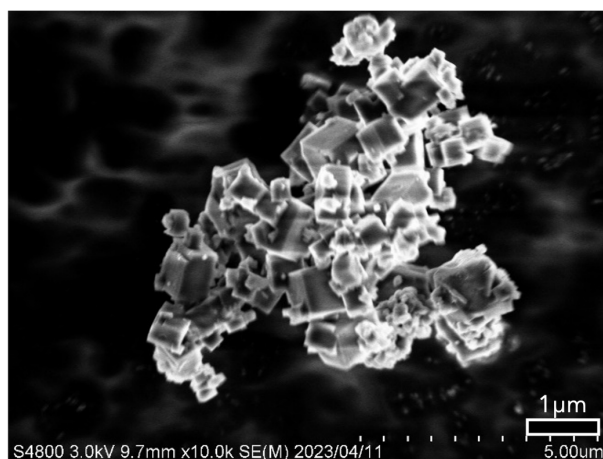

**Figure S6** FESEM images of CD-MOFs prepared by (upper) conventional vapor diffusion method and (bottom) wash-free mechanochemical synthesis. CD-MOF was prepared using  $\text{KHCO}_3$  at  $\text{K}^+/\text{CD} = 2$  by wash-free mechanochemical synthesis.

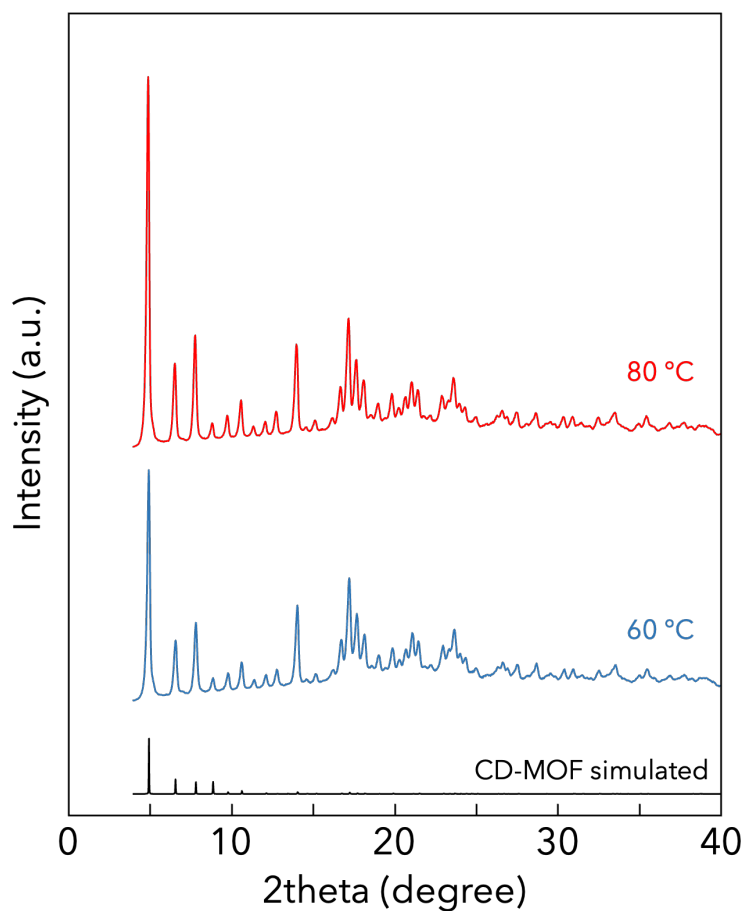

**Figure S7** PXRd patterns of CD-MOFs prepared using KCl at  $K^+/CD = 1.5$  by wash-free mechanochemical synthesis. After the mechanochemical step, the products were dried at 60 °C or 80 °C.

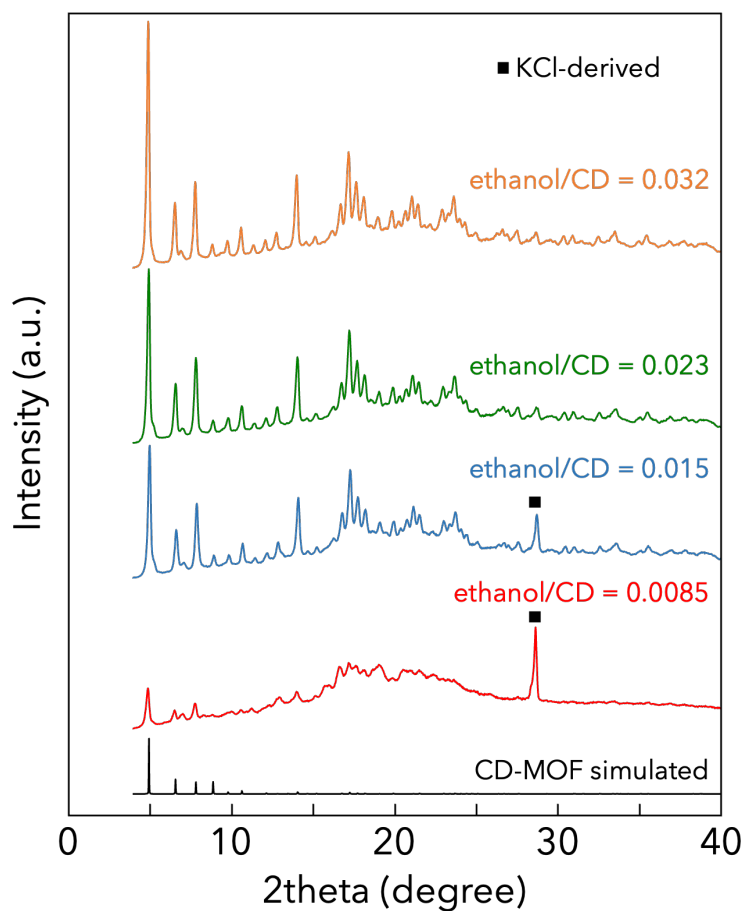

**Figure S8** PXR D patterns of CD-MOFs prepared by wash-free mechanochemical synthesis with different ethanol/CD ratios using KCl at  $K^+/CD = 1$ .

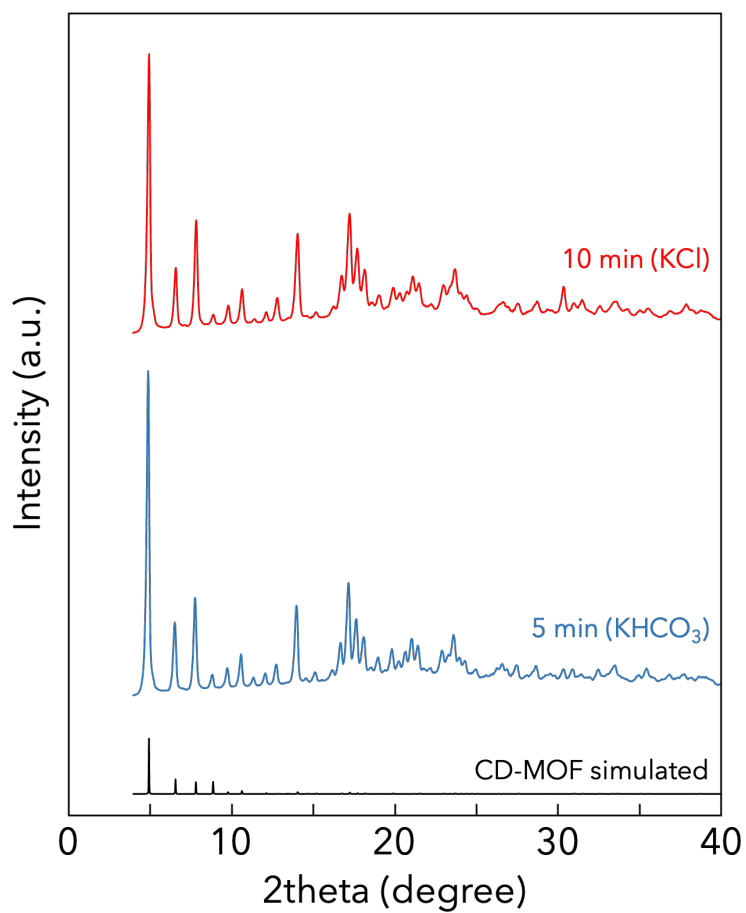

**Figure S9** PXR D patterns of CD-MOFs prepared at different mechanochemical treatment times. CD-MOFs were prepared using KCl or KHCO<sub>3</sub> at K<sup>+</sup>/CD = 1.5.

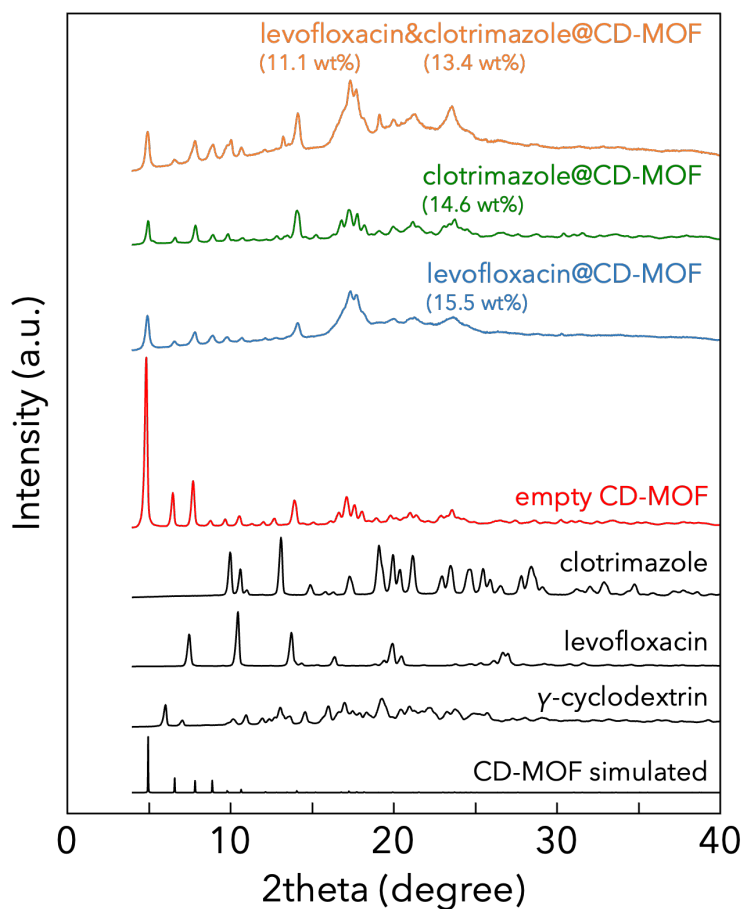

**Figure S10** PXRD patterns of CD-MOF and drug-encapsulated CD-MOF. CD-MOFs were prepared by wash-free mechanochemical synthesis using  $\text{KHCO}_3$  at  $\text{K}^+/\text{CD} = 2$ .
